# Supplementary material
Source: Springer Nature journal article supplement (https://www.springermedizin.de/resource/supplementary/12958_2008_497_MOESM1_ESM.pdf/9568150)

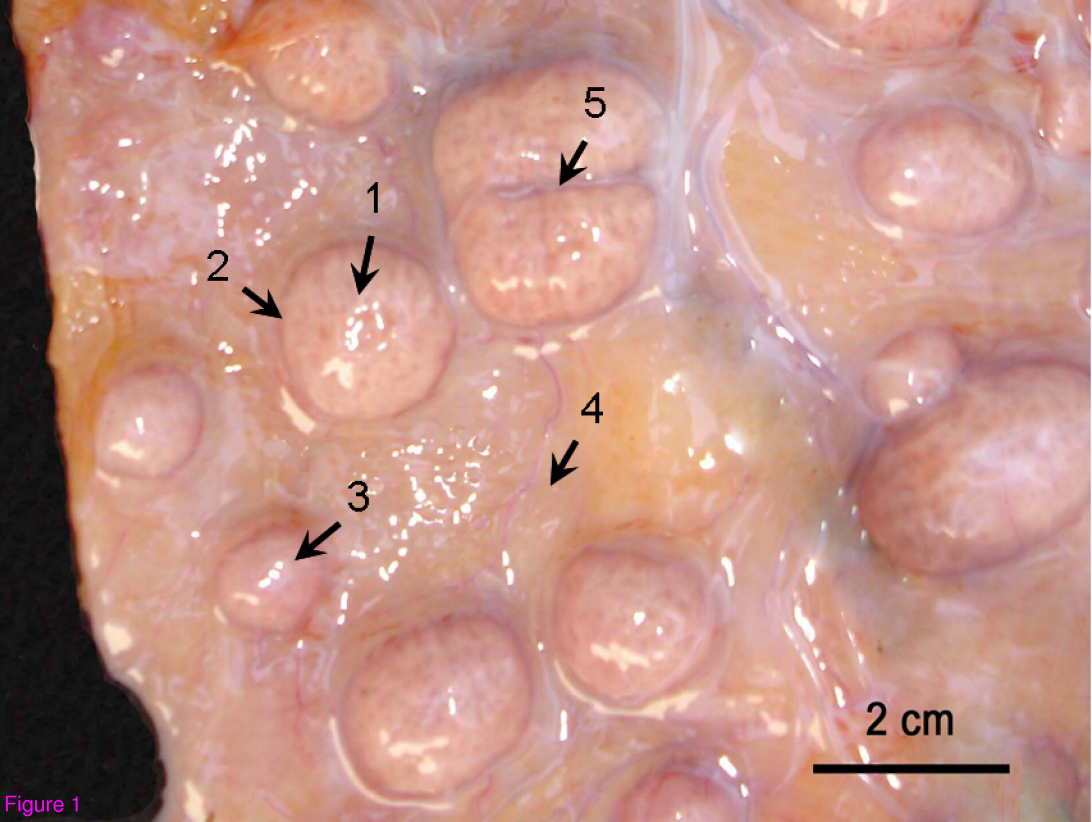

Figure 1

Supplement: MOESM1 [file 9568150]
